# Supplementary material
Source: publisher figshare collection journal article supplement (https://frontiersin.figshare.com/ndownloader/files/23044004)

## *Supplementary Material*

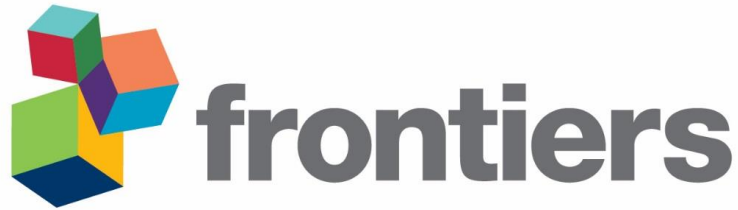

**Supplementary Figure 1.** Copy number variation (CNV) analysis in 38 isolates of *Candida haemulonii* using B11899 as reference. Each scaffold from 1 to 11 is color-coded in the  $x$ -axis. Average normalized depth (5-kb windows) on the  $y$ -axis is relative to ploidy levels.

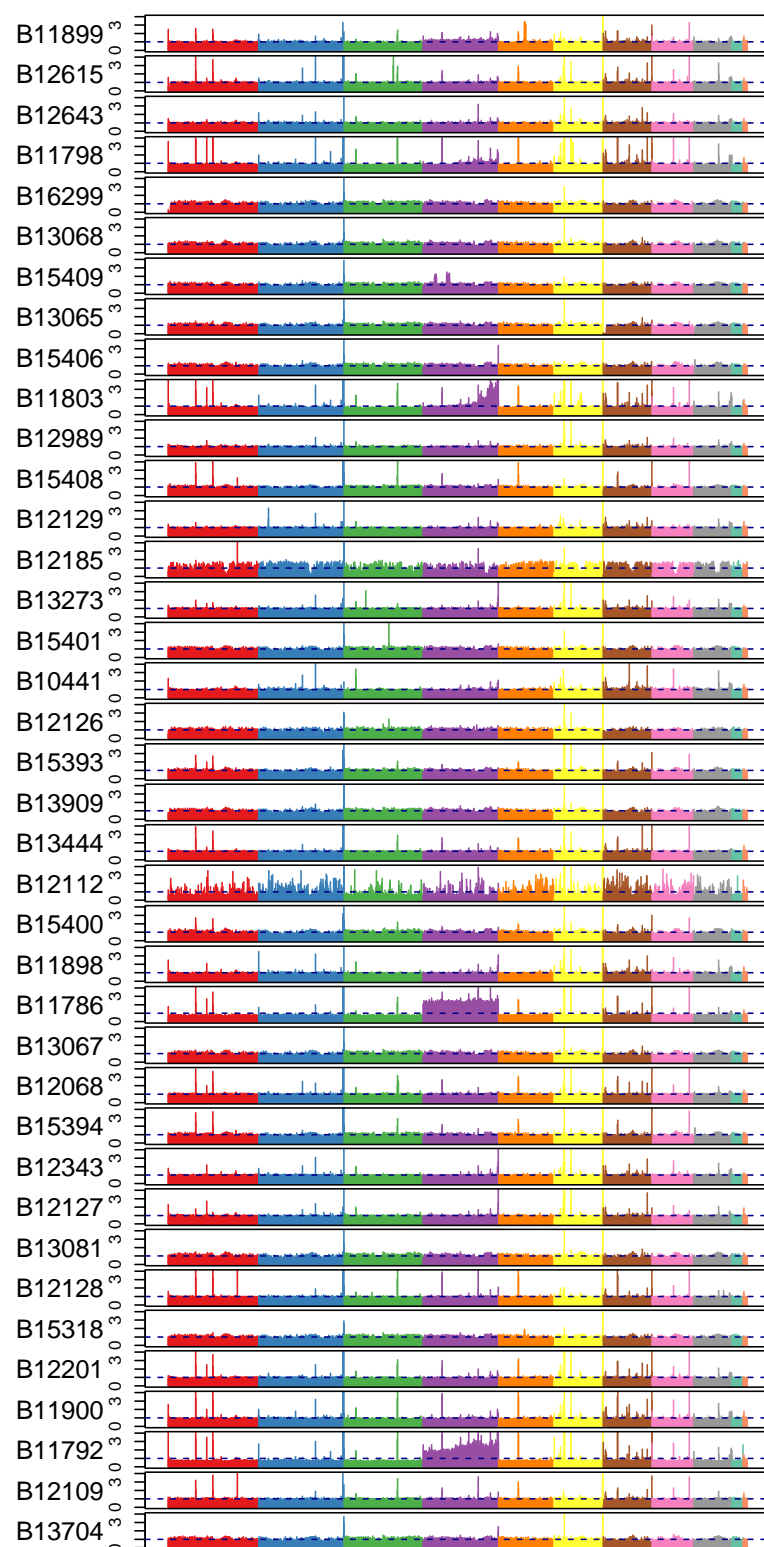

Supplement: Supplementary file [file 23044004]
